# Supplementary material for: Comparison of Incision and Drainage Procedure with Drainage and Ligation of the Intersphincteric Fistula Tract in the Treatment of Deep Perianal Abscess
Source: Research Square preprint supplement (doi:10.21203/rs.3.rs-8403324/v1), 2026-01-16
Supplement: Supplementary file 1 [file 1453b06f6dd670a8dae9cf6b.docx]

| **Independent Variables** | **B** | **S.E.** | **Wald** | **df** | **Sig.** | **Exp(B)** |
| --- | --- | --- | --- | --- | --- | --- |
| Sex | .970 | 1.753 | .306 | 1 | .580 | 2.638 |
| Age | -.007 | .050 | .020 | 1 | .887 | .993 |
| BMI (kg/m2) | .181 | .166 | 1.183 | 1 | .277 | 1.198 |
| Smoking | -.910 | 1.270 | .513 | 1 | .474 | .402 |
| DM | 1.955 | 2.861 | .467 | 1 | .494 | 7.066 |
| Previous perianal abscess | 3.351 | 2.413 | 1.929 | 1 | .165 | 28.523 |
| Antibiotic use before surgery | -3.282 | 2.126 | 2.382 | 1 | .123 | .038 |
| Duration of symptoms (days) | -.148 | .553 | .072 | 1 | .789 | .862 |
| Operative time (minutes) | .050 | .133 | .143 | 1 | .706 | 1.052 |
| Postoperative hospitalization (days) | .481 | .533 | .814 | 1 | .367 | 1.618 |
| Pain score, day 1. | .009 | .187 | .002 | 1 | .963 | 1.009 |
| Pain score, day 14. | .479 | .232 | 4.269 | 1 | **.039** | 1.614 |
| Time from surgery till healing (days) | -.141 | .101 | 1.947 | 1 | .163 | .868 |
| WBC (×109/L) | -.209 | .160 | 1.697 | 1 | .193 | .812 |
| CRP (mg/L) | .033 | .033 | 1.005 | 1 | .316 | 1.034 |
| Type of fistula |  |  | 2.033 | 3 | .566 |  |
| Abscess size (cm2) | .039 | .087 | .203 | 1 | .652 | 1.040 |
| Type of operation | -8.043 | 3.714 | 4.690 | 1 | **.030** | .000 |
| Constant | -19.171 | 6691.424 | .000 | 1 | .998 | .000 |
| Dummy variables were used to include categorical variables in the regression.  In logistic regression analysis, the pain score on day 14 was found to be a significant predictor of the probability of fistula non-development at month 6, independently increasing the probability (B=0.479, OR=1.614, p=0.039).  Each unit increase in pain score approximately increases the probability of fistula non-development by 1.6 times.  Drainage + LIFT application was found to significantly reduce the probability of fistula development compared to drainage alone.  R2 COX and Snell 50.5% | | | | | |
