# Supplementary material for: Comparison of Incision and Drainage Procedure with Drainage and Ligation of the Intersphincteric Fistula Tract in the Treatment of Deep Perianal Abscess
Source: Research Square preprint supplement (doi:10.21203/rs.3.rs-8403324/v1), 2026-01-16
Supplement: Supplementary file 2 [file 5d63d05cd0d09237c1002f53.docx]

| Item | Drainage (n=57) | Drainage+LIFT (n=54) | P value |
| --- | --- | --- | --- |
| Age, years (mean, SD) | 46.40 (±11.14) | 44.521 (±12.10) | .392 |
| BMI, kg/m2 (mean, SD) | 27.19 (±4.10) | 28.54 (±4.13) | .563 |
| Sex (*n*, %)  Male  Female | 47 (82.45%)  10 (17.55%) | 45 (83.33%)  9 (16.67%) | .552 |
| Smoking (*n*, %) | 28 (49.13%) | 30 (55.60%) | .313 |
| DM (*n*, %) | 11 (19.30%) | 10 (18.50%) | .555 |
| Previous perianal abscess (n, %) | 5 (8.77%) | 6 (11.1%) | .462 |
| Duration of symptoms, days (mean, SD) | 4.46 (±1.93) | 4.33 (±1.69) | .722 |
| Antibiotic use before surgery (*n*, %) | 22 (38,60%) | 19 (35,20%) | .431 |
| WBC (×109/L) (mean, SD) | 16.84 (±3.07) | 17.76 (±3.90) | .170 |
| CRP (mg/L) (mean, %) | 44.39 (20.76%) | 42.35 (18.63%) | .589 |
| Type of fistula (*n*, %) |  |  |  |
| Horseshoe | 2 (3.5%) | 0 (0.0%) | **.000** |
| High trans-sphincteric | 20 (35.1%) | 30 (55.6%) |  |
| Mid trans-sphincteric | 14 (24.6%) | 24 (44.4%) |  |
| No fistula identified | 21(18.9%) | 0 (0.0%) |  |
| Abscess size (cm2) (mean, SD) | 12,90 (±7,39) | 13,11 (±7,38) | .878 |
| Preoperative Wexner score (mean, SD) | 2.32 (±1.35) | 2.69 (±2.02) | .324 |

Numerical data are presented as mean (SD) as appropriate, and categorical data are presented as frequency (%), statistical significance at P-value < 0.05.

BMI body mass index, DM diabetes mellitus, WBC White blood cell count, CRP C-reactive protein value.
