# Supplementary material for: Comparison of Incision and Drainage Procedure with Drainage and Ligation of the Intersphincteric Fistula Tract in the Treatment of Deep Perianal Abscess
Source: Research Square preprint supplement (doi:10.21203/rs.3.rs-8403324/v1), 2026-01-16
Supplement: Supplementary file 3 [file 81f702d29276746ad17e42c6.docx]

| **Means and Medians for Survival Time** | | | | | | | | |
| --- | --- | --- | --- | --- | --- | --- | --- | --- |
| Operation procedure | Meana | | | | Median | | | |
| Estimate | Std. Error | 95% Confidence Interval | | Estimate | Std. Error | 95% Confidence Interval | |
| Lower Bound | Upper Bound | Lower Bound | Upper Bound |
| Drainage | 13.616 | .509 | 12.618 | 14.613 | 16.000 | .946 | 14.145 | 17.855 |
| Drainage + LIFT | 15.738 | .141 | 15.461 | 16.015 | . | . | . | . |
| Overall | 14.632 | .291 | 14.061 | 15.202 | . | . | . | . |
| a. Estimation is limited to the largest survival time if it is censored. | | | | | | | | |

| **Overall Comparisons** | | | |
| --- | --- | --- | --- |
|  | Chi-Square | df | Sig. |
| Log Rank (Mantel-Cox) | 13.510 | 1 | .000 |
| Equality of survival distributions for different treatment levels. | | | |
