# Supplementary material for: Comparison of Incision and Drainage Procedure with Drainage and Ligation of the Intersphincteric Fistula Tract in the Treatment of Deep Perianal Abscess
Source: Research Square preprint supplement (doi:10.21203/rs.3.rs-8403324/v1), 2026-01-16
Supplement: Supplementary file 5 [file c3a3337d4bb782fddaafcbfc.docx]

| **Item** | **Drainage (n=57)** | **Drainage+LIFT (n=54)** | **P value** |
| --- | --- | --- | --- |
| Operative time, min (mean, SD) | 31.61 (±7,59) | 43,85 (±5,85) | **.000** |
| Abscess culture positivity (n, %) | 32 (56.1%) | 33 (61.1%) | .700 |
| Postoperative hospitalization, days (mean, SD) | 5.09 (±2,31) | 8.20 (±3.14) | **.000** |
| Postoperative complications (n, %) |  |  |  |
| No complications | 46 (80.7%) | 39 (72.2%) | .545 |
| Wound infection | 5 (8.8%) | 3 (5.6%) |  |
| Perianal edema | 3 (5.2%) | 4 (7.4%) |  |
| Bleeding | 2 (3.5%) | 3 (5.6%) |  |
| Urinary retention | 1 (1.8%) | 2 (3.7%) |  |
| Anal fissure | 0 (0%) | 3 (5.5%) |  |
| Pain score, day 1. (mean, SD) | 15,11 (±5.65) | 18.19 (±5.82) | **.006** |
| Pain score, day 14. (mean, SD) | 4.49 (±2.99) | 4.76 (±3.97) | .688 |
| Time from surgery till healing, days (mean, SD) | 38.40 (±10.29) | 47.74 (±7.66) | **.000** |
| Wexner score, 3rd month (mean, SD) | 2.89 (±2.04) | 3.61 (±2.70) | .453 |
| Wexner score, 6th month (mean, SD) | 3.73 (±2.72) | 4.56 (±3.81) | .196 |
| Recurrent fistula, 3rd month (n, %) | 16 (28.1%) | 3 (5.7%) | **.001** |
| Persistent fistula, 6th month (n, %)1 | 21 (38.2%) | 3 (3.7%) | **.000** |
| Follow-up period, months (mean, SD) | 11.00 (±3.77) | 11.48 (±3.16) | .662 |
| Recurrent abscesses (n, %) | 7 (12.72%) | 1 (1.88%) | .061 |

1 Two patients who underwent drainage procedures and one patient who underwent drainage + lift procedures discontinued follow-up six months prior.

Numerical data are presented as mean (SD) as appropriate, and categorical data are presented as frequency (%), statistical significance at P-value < 0.05.
